# Supplementary material for: Access to 4-(pyridin-2-yloxy)-1,2,4-thiadiazol-5(4 H )-ones via an amidoxime O-heteroarylation/cyclization reaction sequence
Source: Royal Society of Chemistry journal article supplement (doi:10.1039/d5ob01387a), 2025-01-01
Supplement: d5ob01387a2.xlsx [file d5ob01387a2.xlsx]

## Sheet: Sheet1
Characterisation Checklist
Manuscript ID:
Submitting Author:	Vadim P. Boyarskiy
Manuscrtipt Title:	Access to 4-(pyridin-2-yloxy)-1,2,4-thiadiazol-5(4H)-ones via amidoxime O-heteroarylation/cyclization reactions sequence
Guidelines:
1. Characterisation of new and known compounds should be reported in line with the data requirements of the journal: https://rsc.li/2Jdig5s
2. For each compound, enter the compound number as per manuscript in the first column, and type a single “X” in the cell corresponding to the type of data reported in the manuscript or ESI.
3. Print the completed checklist as a ".pdf" file. During submission, upload the saved file together with your manuscript, and select “Compound Characterization Checklist” as the file designation.
4. If no synthesis is reported in the paper, please indicate this in the yellow box and upload the form as above
Compound number	New	Known with reference(s) cited	Yield	Physucak state / mp if cryst. Colid	IR	UV-Vis	1H NMR	13C NMR	2D NMR	Copy of NMR spectrum in ESI	MS	HRMS	Elemental Analysis	Specific optical rotation	GC/ HPLC	Copy of chromatogram in ESI	X-ray (ORTEP and CIF in ESI)	Notes
1a		x	x				x
1b		x	x				x
1c		x	x				x
1d		x	x				x
1e		x	x				x
1f		x	x				x
1g		x	x				x
1h		x	x				x
1i		x	x				x
1j		x	x				x
1k		x	x				x
1l		x	x				x
1m		x	x				x
1o		x	x				x
1p		x	x				x
1q	x		x				x	x				x
3a	x		x	x			x	x		x		x
3b	x		x	x			x	x		x		x
3c	x		x	x			x	x		x		x
3d	x		x	x			x	x		x		x
3e	x		x	x			x	x		x		x
3f	x		x	x			x	x		x		x
3g	x		x	x			x	x		x		x
3i	x		x	x			x	x		x		x
3j	x		x	x			x	x		x		x
3k	x		x	x			x	x		x		x					x
3l	x		x	x			x	x		x		x
3m	x		x	x			x	x		x		x
3o	x		x	x			x	x		x		x
3p	x		x	x			x	x		x		x
3q	x		x	x			x	x		x		x
3r	x		x	x			x	x		x		x
3s	x		x	x			x	x		x		x
3u	x		x	x			x	x		x		x					x
3v	x		x	x			x	x		x		x
3w	x		x	x			x	x		x		x
3x	x		x	x			x	x		x		x
3y	x		x	x			x	x		x		x					x
3z	x		x	x			x	x		x		x
3aa	x		x	x			x	x	x	x		x
3ab	x		x	x			x	x		x		x
3ac	x		x	x			x	x		x		x
3ad	x		x	x			x	x		x		x
4a	x		x	x			x	x		x		x
4b	x		x	x			x	x		x		x
4c	x		x	x			x	x		x		x
4d	x		x	x			x	x		x		x
4e	x		x	x			x	x		x		x
4f	x		x	x			x	x		x		x
4g	x		x	x			x	x		x		x
4h	x		x	x			x	x		x		x
4i	x		x	x			x	x		x		x
4j	x		x	x			x	x		x		x
4k	x		x	x			x	x		x		x
4l	x		x	x			x	x		x		x
4m	x		x	x			x	x		x		x					x
4n	x		x	x			x	x		x		x
4o	x		x	x			x	x		x		x
4p	x		x	x			x	x		x		x
4q	x		x	x			x	x		x		x
4r	x		x	x			x	x		x		x
